# Supplementary material for: Rab24 protein levels show dynamic changes in mouse tissues and human cancers
Source: Research Square preprint supplement (doi:10.21203/rs.3.rs-6176716/v1), 2025-03-24
Supplement: Supplementary file 1 [file 13cf23b01f9b7ab0f8f0233b.xlsx]

## Sheet: Sheet1
Cancer type	Tissue origin	Number of patients	Malignant tissue H-score	Benign tissue H-score	Score difference (malignant - benign)
Ductal carcinoma of the breast ER+, c-erbB2+, "luminal B"	Breast	3	210.638	42.45	168.188
Follicular carcinoma of the thyroid gland	Thyroid	3	266.947	100.33	166.617
Angiosarcoma	Soft Tissue (Sarcomas)	3	224.598	58.8167	165.782
Malignant melanoma	Skin	3	256.093	99.7133	156.38
Ductal carcinoma of the breast ER-, c-erbB2+, "HER2 positive"	Breast	3	200.735	53.3667	147.368
Tonsillar squamous cell carcinoma	Head and Neck	3	212.955	80.755	132.2
Cutaneous squamous cell carcinoma	Skin	3	222.543	92.39	130.153
Cervical adenocarcinoma	Cervix	3	224.685	101.66	123.025
Rectal NEC	Colon and Rectum	1	228.18	111.16	117.02
Ductal carcinoma of the breast	Breast	1	194.23	78.81	115.42
Ovarian serous carcinoma	Ovary	3	232.165	127.99	104.175
Neuroendocrine carcinoma of the lung, large cell	Lungs	3	250.575	148.843	101.732
Uterine endometrioid carcinoma	Uterus	3	218.893	119.26	99.6333
Malignant mesothelioma of the pleura	Pleura	3	187.898	90.14	97.7583
Basal cell carcinoma	Skin	4	221.437	123.998	97.4396
Synovial Sarcoma	Soft Tissue (Sarcomas)	3	137.362	43.33	94.0317
Hepatocellular Carcinoma	Liver and Biliary Tract	3	223.3	138.127	85.1733
Ovarian endometrioid carcinoma	Ovary	3	211.047	128.053	82.9933
Malignant Fibrous Histiocytoma	Soft Tissue (Sarcomas)	3	107.395	25.0233	82.3717
Epidermoid carcinoma of the oral cavity	Head and Neck	3	183.695	107.263	76.4317
Adenocarcinoma of the lung	Lungs	3	167.367	94.02	73.3467
Fibrosarcoma	Soft Tissue (Sarcomas)	3	100.306	28.965	71.3407
Gastric or Small Intestine NEC, G3	Small Intestine	2	163.335	92.22	71.115
Ductal carcinoma of the breast ER+, c-erbB2-, "luminal A"	Breast	3	139.638	72.9967	66.6417
Seminoma	Testis	3	188.042	129.615	58.4267
Small cell carcinoma of the lung	Lungs	3	150.532	99.85	50.6817
Testicular embryonal carcinoma	Testis	3	189.488	145.74	43.7483
Prostate adenocarcinoma Gleason 9	Prostate	3	202.205	162.07	40.135
Rhabdomyosarcoma	Soft Tissue (Sarcomas)	3	101.147	62.65	38.4967
Papillary carcinoma of the thyroid gland	Thyroid	4	220.958	184.8	36.1575
Leiomyosarcoma	Soft Tissue (Sarcomas)	4	86.18	51.0267	35.1533
Gallbladder Adenocarcinoma	Liver and Biliary Tract	3	190.168	156.307	33.8617
Small Intestine NET G1	Small Intestine	3	146.868	116.523	30.345
Pancreatic IPMN (Intraductal Papillary Mucinous Neoplasm)	Pancreas	3	196.835	168.04	28.795
Liposarcoma	Soft Tissue (Sarcomas)	3	72.1167	50.3933	21.7233
Epidermoid carcinoma of the larynx	Head and Neck	3	132.423	112.2	20.2233
Urothelial carcinoma	Urinary Tract (Kidney, Bladder, Urethra)	3	192.823	173.08	19.7433
Uterine leiomyosarcoma	Uterus	2	143.858	125.74	18.1175
Uterine stromal sarcoma	Uterus	3	111.823	96.245	15.5783
Rectal Adenocarcinoma	Colon and Rectum	3	140.553	128.8	11.7533
Prostate adenocarcinoma Gleason 7	Prostate	3	158.177	147.43	10.7467
Cervical epidermoid carcinoma	Cervix	3	142.452	132.315	10.1367
Small Intestine NET G2	Small Intestine	3	122.977	115.723	7.25333
Clear cell carcinoma of the uterus	Uterus	3	168.245	162.3	5.945
Squamous cell carcinoma of the lungs	Lungs	3	122.18	121.89	0.29
Esophageal Squamous Cell Carcinoma	Esophagus	3	125.072	128.857	-3.785
Lobular carcinoma of the breast	Breast	3	76.5067	80.56	-4.05333
Pancreatic NET G2	Pancreas	3	279.38	284.785	-5.405
Tubular carcinoma of the breast	Breast	3	130.104	136.63	-6.526
Testicular yolk sac tumour/component	Testis	2	141.132	149.96	-8.8275
Appendiceal Adenocarcinoma	Appendix	3	123.785	134.7	-10.915
Gastric GIST	Stomach (Gastric)	3	159.782	173.495	-13.7125
Nephroblastoma (Wilms' tumour)	Urinary Tract (Kidney, Bladder, Urethra)	3	181.327	200.23	-18.9033
Pancreatic NET G1	Pancreas	3	273.368	298.285	-24.917
Chromophobe renal carcinoma	Urinary Tract (Kidney, Bladder, Urethra)	2	126.458	156.61	-30.1517
Renal clear cell carcinoma	Urinary Tract (Kidney, Bladder, Urethra)	3	153.585	186.137	-32.5517
Appendiceal NEC	Appendix	3	131.755	174.78	-43.025
Gastric Intestinal Adenocarcinoma	Stomach (Gastric)	3	111.712	165.667	-53.9547
Appendiceal NET G2	Appendix	3	169.59	226.37	-56.78
Pancreatic neuroendocrine carcinoma (NEC, G3)	Pancreas	2	222.855	281.62	-58.765
Renal papillary carcinoma	Urinary Tract (Kidney, Bladder, Urethra)	3	198.003	257.12	-59.1167
Cholangiocarcinoma	Liver and Biliary Tract	2	126.215	185.393	-59.1783
Appendiceal NET G1	Appendix	3	163.343	247.77	-84.4267
Pancreatic adenocarcinoma	Pancreas	3	122.958	217.735	-94.7767
Gastric Diffuse Adenocarcinoma	Stomach (Gastric)	3	106.578	210.11	-103.532
Appendiceal LAMN	Appendix	2	100.65	Not available	Not available
Astrocytoma	Central Nervous System	3	164.03	Not available	Not available
Glioblastoma	Central Nervous System	4	211.641	Not available	Not available
Meningioma	Central Nervous System	3	225.193	Not available	Not available
Esophageal Adenocarcinoma	Esophagus	3	110.14	Not available	Not available
Ovarian clear cell carcinoma	Ovary	3	147.524	Not available	Not available
Ovarian mucinous carcinoma	Ovary	3	185.86	Not available	Not available
Ileal Neuroendocrine Carcinoma	Small Intestine	1	143.03	Not available	Not available
Small Intestine Neuroendocrine Carcinoma	Small Intestine	1	150.875	Not available	Not available
Serous carcinoma of the uterus	Uterus	2	202.82	Not available	Not available
